# Supplementary material for: Nonlinear mechanics of lamin filaments and the meshwork topology build an emergent nuclear lamina
Source: PubMed Central journal article supplement (PMC7718915; doi:10.1038/s41467-020-20049-8), 2020-12-04
Supplement: 41467_2020_20049_MOESM3_ESM.pdf [file 41467_2020_20049_MOESM3_ESM.pdf]

## Description of Additional Supplementary Files

File Name: Supplementary Movie 1

Description: Molecular dynamics simulations of pushing lamin filaments from a meshwork of  $\lambda = 0.5$ . Analysis presented in **Fig. 6**.

File Name: Supplementary Movie 2

Description: Molecular dynamics simulations of pushing lamin filaments from a meshwork of  $\lambda = 5.6$ . Analysis presented in **Fig. 6**.
